# Supplementary material for: Alpha-adrenergic receptor activation after fetal hypoxia-ischaemia suppresses transient epileptiform activity and limits loss of oligodendrocytes and hippocampal neurons
Source: PubMed Central journal article supplement (PMC10196751; doi:10.1177/0271678x231153723), 2023-01-26
Supplement: sj-pdf-1-jcb-10.1177_0271678X231153723.pdf [file sj-pdf-1-jcb-10.1177_0271678X231153723.pdf]

**The sympathetic nervous system contributes to post-hypoxia-ischaemia cerebral hypoperfusion and suppression of neural activity**

Simerdeep K. Dhillon<sup>1</sup>, Eleanor R. Gunn<sup>1</sup>, Mette Pedersen<sup>2</sup>, Christopher A. Lear<sup>1</sup>, Guido Wassink<sup>1</sup>, Joanne O. Davidson<sup>1</sup>, Alistair J. Gunn<sup>1</sup>, Laura Bennet<sup>1</sup>.

<sup>1</sup> Department of Physiology, The University of Auckland, Auckland, New Zealand

<sup>2</sup> Department of Pediatrics, Aarhus University Hospital, Aarhus, Denmark

**Supplementary Table 1** Fetal arterial blood pH, partial pressures of oxygen and carbon dioxide, glucose, lactate, oxygen saturation (SO<sub>2</sub>), oxygen content (ctO<sub>2</sub>), haematocrit (Hct) and haemoglobin (Hb) values at 1 hour before 25 minute occlusion, 5 and 17 minutes during occlusion, 1, 2, 4, 6, 24, 48 and 72 hours after the end of occlusion. Data are presented as Mean ± SD. Between group comparisons are shown as \* P < 0.05 vs. sham-HI, # P < 0.05 HI-saline group

|                               | Baseline   | 5 minutes    | 17 minutes   | 1 hour     | 2 hours    | 4 hours    | 6 hours    | 24 hours   | 48 hours   | 72 hours   |
|-------------------------------|------------|--------------|--------------|------------|------------|------------|------------|------------|------------|------------|
| <b>pH</b>                     |            |              |              |            |            |            |            |            |            |            |
| Sham-HI                       | 7.37 ± 0.0 | 7.37 ± 0.0   | 7.37 ± 0.0   | 7.37 ± 0.0 | 7.37 ± 0.0 | 7.37 ± 0.0 | 7.37 ± 0.0 | 7.37 ± 0.0 | 7.37 ± 0.0 | 7.37 ± 0.0 |
| HI-saline                     | 7.38 ± 0.0 | 7.04 ± 0.0*  | 6.85 ± 0.0*  | 7.29 ± 0.0 | 7.33 ± 0.1 | 7.39 ± 0.0 | 7.39 ± 0.0 | 7.36 ± 0.0 | 7.36 ± 0.0 | 7.35 ± 0.0 |
| HI-phentolamine               | 7.36 ± 0.0 | 7.05 ± 0.1*  | 6.87 ± 0.0*  | 7.32 ± 0.0 | 7.37 ± 0.0 | 7.41 ± 0.0 | 7.39 ± 0.0 | 7.36 ± 0.0 | 7.37 ± 0.0 | 7.37 ± 0.0 |
| <b>pO<sub>2</sub> (mmHg)</b>  |            |              |              |            |            |            |            |            |            |            |
| Sham-HI                       | 25.0 ± 3.3 | 24.5 ± 3.0   | 24.2 ± 2.2   | 24.6 ± 1.8 | 23.5 ± 2.7 | 24.1 ± 2.7 | 24.9 ± 4.0 | 23.7 ± 3.1 | 24.3 ± 3.0 | 23.5 ± 3.9 |
| HI-saline                     | 24.3 ± 3.6 | 8.4 ± 1.6*   | 11.1 ± 1.7*  | 28.5 ± 5.5 | 25.4 ± 4.1 | 23.0 ± 5.1 | 23.3 ± 5.0 | 25.9 ± 5.7 | 27.0 ± 5.6 | 27.0 ± 5.6 |
| HI-phentolamine               | 24.5 ± 2.9 | 7.5 ± 2.2*   | 10.3 ± 3.2*  | 24.7 ± 4.1 | 22.8 ± 3.5 | 24.8 ± 2.7 | 25.9 ± 3.8 | 26.8 ± 3.9 | 28.2 ± 2.8 | 27.1 ± 3.2 |
| <b>pCO<sub>2</sub> (mmHg)</b> |            |              |              |            |            |            |            |            |            |            |
| Sham-HI                       | 47.6 ± 1.9 | 47.5 ± 4.2   | 45.5 ± 3.2   | 48.1 ± 2.8 | 50.0 ± 2.6 | 49.3 ± 2.9 | 50.1 ± 2.6 | 50.3 ± 2.6 | 49.7 ± 3.9 | 49.4 ± 3.8 |
| HI-saline                     | 49.3 ± 3.9 | 100.1 ± 8.4* | 133.7 ± 9.4* | 51.2 ± 9.4 | 51.5 ± 8.5 | 47.6 ± 5.5 | 49.4 ± 4.5 | 48.3 ± 3.5 | 46.3 ± 5.0 | 49.1 ± 4.8 |
| HI-phentolamine               | 47.8 ± 1.8 | 93.6 ± 2.5*  | 130.7 ± 2.6* | 46.4 ± 1.5 | 46.1 ± 1.9 | 46.0 ± 1.2 | 46.0 ± 1.3 | 45.8 ± 1.1 | 45.9 ± 0.8 | 44.5 ± 0.9 |
| <b>Glucose (mmol/L)</b>       |            |              |              |            |            |            |            |            |            |            |
| Sham-HI                       | 1.0 ± 0.4  | 1.2 ± 0.3    | 1.1 ± 0.3    | 1.1 ± 0.3  | 1.1 ± 0.3  | 1.1 ± 0.3  | 1.2 ± 0.3  | 1.2 ± 0.2  | 1.2 ± 0.2  | 1.1 ± 0.2  |
| HI-saline                     | 1.0 ± 0.2  | 0.3 ± 0.1*   | 0.7 ± 0.2*   | 1.3 ± 0.3  | 1.4 ± 0.4* | 1.4 ± 0.3* | 1.4 ± 0.2  | 1.1 ± 0.2  | 1.2 ± 0.2  | 1.1 ± 0.2  |
| HI-phentolamine               | 0.9 ± 0.1  | 0.3 ± 0.0*   | 0.6 ± 0.1*   | 1.5 ± 0.2  | 1.0 ± 0.0# | 1.0 ± 0.0# | 1.0 ± 0.0  | 1.1 ± 0.1  | 1.1 ± 0.1  | 1.1 ± 0.1  |
| <b>Lactate (mmol/L)</b>       |            |              |              |            |            |            |            |            |            |            |
| Sham-HI                       | 0.7 ± 0.2  | 0.8 ± 0.1    | 0.9 ± 0.2    | 0.9 ± 0.2  | 0.8 ± 0.2  | 0.9 ± 0.2  | 0.9 ± 0.2  | 0.8 ± 0.1  | 0.8 ± 0.2  | 0.8 ± 0.2  |
| HI-saline                     | 0.9 ± 0.3  | 4.3 ± 0.9*   | 7.1 ± 0.9*   | 4.4 ± 1.6* | 4.1 ± 2.4* | 2.9 ± 1.9* | 2.5 ± 1.6* | 1.1 ± 0.6  | 0.9 ± 0.3  | 0.8 ± 0.2  |
| HI-phentolamine               | 0.6 ± 0.0* | 3.7 ± 0.2*   | 6.0 ± 0.2*   | 3.1 ± 0.3* | 1.5 ± 0.2  | 1.0 ± 0.2  | 1.1 ± 0.2  | 0.7 ± 0.1  | 0.7 ± 0.1  | 0.7 ± 0.1  |

|                 |            |            |            |             |             |             |             |             |             |             |
|-----------------|------------|------------|------------|-------------|-------------|-------------|-------------|-------------|-------------|-------------|
| <b>SO2</b>      |            |            |            |             |             |             |             |             |             |             |
| Sham-HI         | 71.4 ± 5.3 | 72.2 ± 4.3 | 72.1 ± 4.4 | 71.0 ± 7.1  | 69.8 ± 7.9  | 71.3 ± 5.8  | 71.6 ± 4.9  | 69.6 ± 5.8  | 69.2 ± 3.6  | 68.5 ± 5.2  |
| HI-saline       | 64.6 ± 9.1 | 7.9 ± 1.7* | 9.2 ± 2.0* | 69.3 ± 14.7 | 64.7 ± 11.5 | 61.2 ± 15.7 | 63.0 ± 16.3 | 67.0 ± 13.0 | 69.6 ± 11.2 | 69.7 ± 11.3 |
| HI-phentolamine | 71.2 ± 5.9 | 8.3 ± 1.6* | 8.6 ± 2.1* | 68.1 ± 11.7 | 65.0 ± 12.0 | 73.6 ± 7.8  | 75.0 ± 9.5  | 74.8 ± 10.2 | 79.6 ± 6.3  | 77.3 ± 8.7  |
| <b>ctO2</b>     |            |            |            |             |             |             |             |             |             |             |
| Sham-HI         | 3.8 ± 0.4  | 3.8 ± 0.6  | 3.8 ± 0.4  | 3.6 ± 0.5   | 3.6 ± 0.5   | 3.7 ± 0.4   | 3.9 ± 0.5   | 3.6 ± 0.4   | 3.6 ± 0.5   | 3.6 ± 0.6   |
| HI-saline       | 3.5 ± 0.3  | 0.4 ± 0.1* | 0.5 ± 0.0* | 4.0 ± 0.6   | 3.7 ± 0.5   | 3.3 ± 0.8   | 3.4 ± 0.8   | 3.6 ± 0.7   | 3.6 ± 0.6   | 3.7 ± 0.5   |
| HI-phentolamine | 3.5 ± 0.3  | 0.4 ± 0.1* | 0.5 ± 0.1* | 3.5 ± 0.7   | 3.2 ± 0.3   | 3.7 ± 0.2   | 3.9 ± 0.3   | 4.1 ± 0.5   | 4.2 ± 0.2   | 4.5 ± 0.7*  |
| <b>Hct</b>      |            |            |            |             |             |             |             |             |             |             |
| Sham-HI         | 25.3 ± 1.2 | 25.5 ± 3.0 | 25.1 ± 2.0 | 24.8 ± 2.1  | 25.2 ± 1.2  | 24.7 ± 1.3  | 25.0 ± 1.3  | 25.1 ± 1.6  | 25.1 ± 2.2  | 25.0 ± 1.8  |
| HI-saline       | 27.4 ± 4.4 | 28.6 ± 4.6 | 27.8 ± 3.8 | 29.2 ± 4.7  | 28.5 ± 4.6  | 26.8 ± 4.4  | 27.3 ± 6.0  | 26.7 ± 4.3  | 25.0 ± 3.8  | 25.6 ± 3.4  |
| HI-phentolamine | 24.4 ± 2.3 | 28.1 ± 4.3 | 27.8 ± 3.7 | 25.2 ± 2.9  | 24.4 ± 3.7  | 24.5 ± 2.3  | 25.6 ± 2.1  | 26.8 ± 2.8  | 26.0 ± 2.0  | 26.5 ± 3.1  |
| <b>Hb</b>       |            |            |            |             |             |             |             |             |             |             |
| Sham-HI         | 8.6 ± 0.4  | 8.5 ± 0.8  | 8.5 ± 0.6  | 8.4 ± 0.7   | 8.5 ± 0.5   | 8.4 ± 0.4   | 8.6 ± 0.4   | 8.7 ± 0.7   | 8.6 ± 0.8   | 8.5 ± 0.7   |
| HI-saline       | 9.3 ± 1.3  | 9.7 ± 1.7  | 9.4 ± 1.4  | 9.9 ± 1.6   | 9.6 ± 1.6   | 9.1 ± 1.5   | 9.2 ± 2.1   | 9.1 ± 1.6   | 8.5 ± 1.3   | 8.7 ± 1.2   |
| HI-phentolamine | 8.3 ± 0.8  | 9.6 ± 1.4  | 9.4 ± 1.3  | 8.6 ± 1.0   | 8.3 ± 1.2   | 8.4 ± 0.8   | 8.6 ± 0.8   | 9.0 ± 0.9   | 8.8 ± 0.7   | 9.0 ± 1.0   |

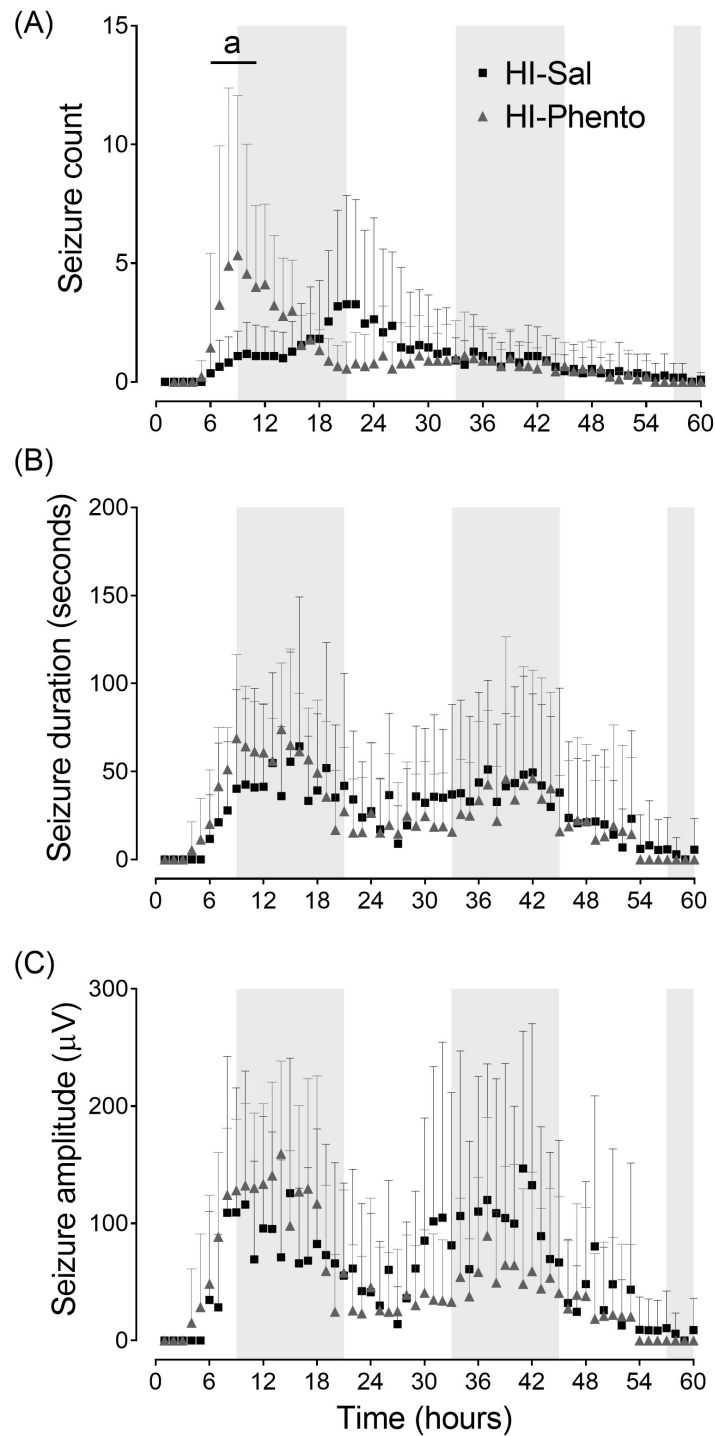

**Supplementary Figure 1:** Time sequence of changes in seizure count (Panel A), duration (Panel B) and amplitude (Panel C) during the post-HI recovery in the HI-saline (closed squares,  $n = 9$ ) and HI-phentolamine (grey triangles,  $n = 10$ ) groups. The shaded areas represent the periods of night time (dark) (6 pm to 6am). Data are hourly averages presented as mean  $\pm$  SD, and were analysed using one-way ANOVA. Figure symbol is (a) HI-saline vs. HI-phentolamine  $P < 0.05$ .

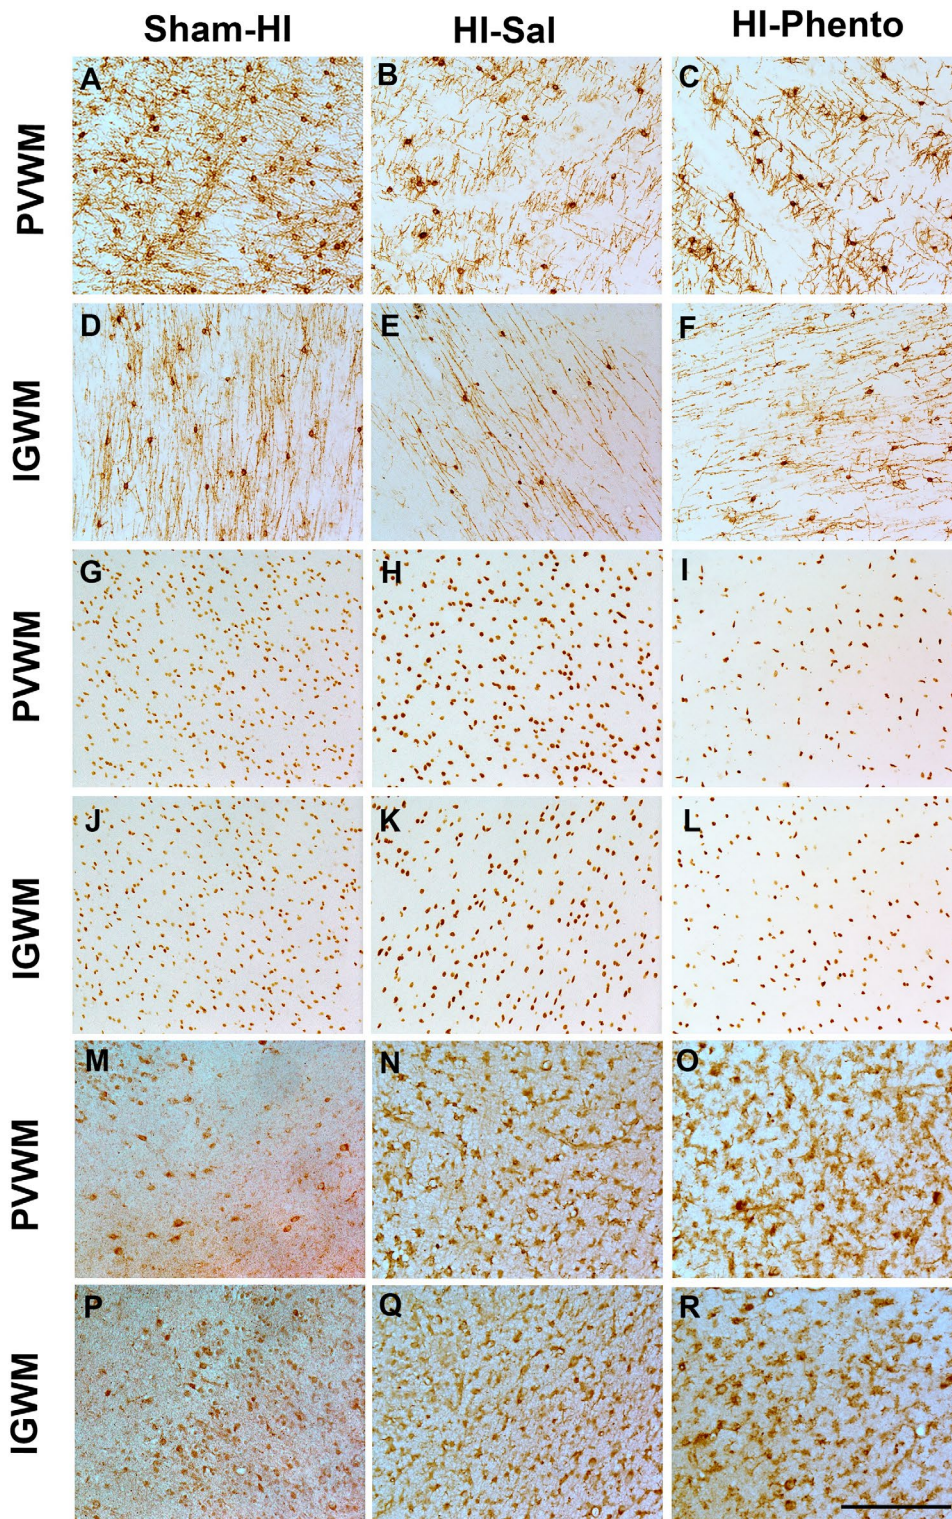

**Supplementary Figure 2:** Photomicrographs show immature and mature oligodendrocytes (CNPase-positive cells) in PVWM, (Panel A-C), IGWM (Panel D-F), total oligodendrocytes (olig-2-positive cells) in PVWM (Panel G-I) and IGWM (Panel J-L) and microglia and macrophages (Iba1-positive cells) in PVWM (Panel M-O) and IGWM (Panel P-R) in the sham-HI, HI-saline and HI-phenolamine groups at 72 hours post-HI. Scale bar is 50  $\mu$ m.
